# Supplementary material for: Estimating the number of children exposed to parental psychiatric disorders through a national health survey
Source: PubMed Central journal article supplement (PMC2647902; doi:10.1186/1753-2000-3-6), 2009-02-19
Supplement: 1753-2000-3-6-S1.pdf [file 1753-2000-3-6-S1.pdf]

Table S1 - Proportion of Canadian children under 12 who have a parent with mental disorders.

| <i>Proportion and number of children under 12 living with parents with selected MI</i> |                          |                      |                           |                      |                                       |                      |
|----------------------------------------------------------------------------------------|--------------------------|----------------------|---------------------------|----------------------|---------------------------------------|----------------------|
| <b>DSM-IV Diagnosis<br/>(12 months)</b>                                                | <b>0-4<br/>% (95%CI)</b> | <b>n<sup>a</sup></b> | <b>5-11<br/>% (95%CI)</b> | <b>n<sup>a</sup></b> | <b>Total (under 12)<br/>% (95%CI)</b> | <b>n<sup>a</sup></b> |
| <b>Any Anxiety disorder</b>                                                            | <b>4.0 (3.1;4.8)</b>     | <b>88,490</b>        | <b>5.1 (3.9;5.7)</b>      | <b>126,824</b>       | <b>4.6 (3.8;5.3)</b>                  | <b>216,153</b>       |
| Agoraphobia                                                                            | 0.6 (0.3;1.0)            | 13,616               | 0.7 (0.4;1.2)             | 17,186               | 0.7 (0.3;1.2)                         | 30,803               |
| Panic disorder                                                                         | 1.7 (1.2;1.9)            | 37,975               | 1.8 (1.1;2.0)             | 44,215               | 1.7 (1.2;2.5)                         | 82,191               |
| Social phobia                                                                          | 2.2 (1.9;2.8)            | 49,211               | 2.9 (2.3;3.5)             | 73,075               | 2.6 (2.0;3.1)                         | 122,302              |
| <b>Any Mood disorder</b>                                                               | <b>5.1 (4.7;5.6)</b>     | <b>112,825</b>       | <b>5.2 (4.6;5.9)</b>      | <b>129,311</b>       | <b>5.1 (4.8;5.7)</b>                  | <b>239,649</b>       |
| Major Depression                                                                       | 4.3 (4.0;4.5)            | 95,348               | 4.5 (4.0;5.1)             | 110,739              | 4.4 (3.9;5.0)                         | 206,091              |
| Mania                                                                                  | 1.0 (0.7;1.6)            | 22,130               | 0.9 (0.5;1.4)             | 22,373               | 0.9 (0.5;1.3)                         | 44,501               |
| <b>Any Substance use disorder*</b>                                                     | <b>9.8 (8.4;11.3)</b>    | <b>216,801</b>       | <b>10.0 (9.1;11.6)</b>    | <b>248,674</b>       | <b>10.0 (9.3; 10.5)</b>               | <b>469,900</b>       |
| Alcohol Dependence                                                                     | 2.2 (1.8;2.7)            | 209,237              | 2.0 (1.5;2.7)             | 212,439              | 2.1 (1.8;2.7)                         | 421,655              |
| Substance Abuse                                                                        | 9.5 (8.9;9.9)            | 47,608               | 8.5 (7.8;9.0)             | 49,134               | 9.0 (8.5;9.6)                         | 96,738               |
| Illicit Drug Dependence                                                                | 0.3 (0.1;0.7)            | 7,273                | 0.4 (0.2;0.7)             | 9,034                | 0.3 (0.1;0.7)                         | 16,308               |
| <b>TOTAL (Any Disorder)</b>                                                            | <b>12.3 (11.2;13.1)</b>  | <b>272,107</b>       | <b>11.9 (11.3;12.5)</b>   | <b>295,922</b>       | <b>12.1 (11.5;12.3)</b>               | <b>568,578</b>       |

Note: Since multiple disorders are possible in the same individual, the same child may be exposed to more than one.

<sup>a</sup> total number of children estimated based on 2006 Census estimates.

\*Problems or dependence

Table S2 - Proportion of Canadian children under 12 who have parents with mental disorders that did not receive mental health care in the previous 12 months.

| <i>Proportion and number of children under 12 living with parents with selected untreated MI</i> |                          |                      |                           |                      |                                       |                      |
|--------------------------------------------------------------------------------------------------|--------------------------|----------------------|---------------------------|----------------------|---------------------------------------|----------------------|
| <b>DSM-IV Diagnosis<br/>(12 months)</b>                                                          | <b>0-4<br/>% (95%CI)</b> | <b>n<sup>a</sup></b> | <b>5-11<br/>% (95%CI)</b> | <b>n<sup>a</sup></b> | <b>Total (under 12)<br/>% (95%CI)</b> | <b>n<sup>a</sup></b> |
| <b>Any Anxiety disorder</b>                                                                      | <b>2.3 (2.0;3.7)</b>     | <b>50,882</b>        | <b>1.9 (1.5;2.6)</b>      | <b>47,248</b>        | <b>2.2 (1.9;3.1)</b>                  | <b>103,378</b>       |
| Agoraphobia 0.5                                                                                  | (0.2;0.7)                | 10,710               | 0.3 (0.1;0.8)             | 7,252                | 0.4 (0.1;0.7)                         | 17,957               |
| Panic disorder                                                                                   | 1.1 (0.8;1.6)            | 23,936               | 0.5 (0.2;1.0)             | 13,666               | 0.8 (0.3;1.2)                         | 37,590               |
| Social phobia                                                                                    | 1.4 (1.2;1.9)            | 30,295               | 1.5 (1.3;2.0)             | 38,245               | 1.5 (1.3;1.9)                         | 68,544               |
| <b>Any Mood disorder</b>                                                                         | <b>1.4 (1.0;1.9)</b>     | <b>30,972</b>        | <b>1.7 (1.3;2.2)</b>      | <b>42,275</b>        | <b>1.5 (1.0;1.8)</b>                  | <b>70,485</b>        |
| Major Depression                                                                                 | 1.3 (0.7;1.7)            | 29,420               | 1.6 (1.1;2.0)             | 40,036               | 1.5 (1.0;1.9)                         | 69,462               |
| Mania 0.1                                                                                        | (0.0;0.4)                | 2,212                | 0.08(0.0;0.2)             | 1,989                | 0.1 (0.0;0.3)                         | 4,699                |
| <b>Any Substance use disorder*</b>                                                               | <b>9.0 (8.5;9.7)</b>     | <b>199,103</b>       | <b>8.0 (7.4;8.9)</b>      | <b>198,939</b>       | <b>8.2 (7.7;9.3)</b>                  | <b>385,318</b>       |
| Alcohol Dependence                                                                               | 1.8 (1.1;2.3)            | 178,844              | 1.4 (1.0;2.1)             | 181,583              | 1.6 (1.3;2.0)                         | 360,409              |
| Substance Abuse                                                                                  | 8.1 (7.8;8.5)            | 38,877               | 7.2 (6.7;7.9)             | 35,051               | 7.7 (7.1;8.5)                         | 73,919               |
| Illicit Drug Dependence                                                                          | 0.1 (0.0;0.3)            | 2,828                | 0.1 (0.0;0.4)             | 2,487                | 0.1 (0.0;0.3)                         | 4,699                |
| <b>TOTAL (Any Disorder)</b>                                                                      | <b>9.6 (8.9;10.2)</b>    | <b>212,376</b>       | <b>8.9(7.6;9.2)</b>       | <b>221,320</b>       | <b>9.5(9.0;10.1)</b>                  | <b>446,405</b>       |

Note: Since multiple disorders are possible in the same individual, the same child may be exposed to more than one.

<sup>a</sup>total number of children estimated based on 2006 Census of Canada estimates.

\*Problems or dependence

Table S3 – Proportion of Canadian children under 12 who have single parents with mental disorders.

| <i>Proportion and number of children under 12 living with single parents with selected MI</i> |                          |                      |                           |                      |                                       |                      |
|-----------------------------------------------------------------------------------------------|--------------------------|----------------------|---------------------------|----------------------|---------------------------------------|----------------------|
| <b>DSM-IV Diagnosis<br/>(12 months)</b>                                                       | <b>0-4<br/>% (95%CI)</b> | <b>n<sup>a</sup></b> | <b>5-11<br/>% (95%CI)</b> | <b>n<sup>a</sup></b> | <b>Total (under 12)<br/>% (95%CI)</b> | <b>n<sup>a</sup></b> |
| <b>Any Anxiety disorder</b>                                                                   | <b>0.6 (0.1;1.6)</b>     | <b>13,274</b>        | <b>0.7 (0.3;1.5)</b>      | <b>17,407</b>        | <b>0.7 (0.3;1.1)</b>                  | <b>34,303</b>        |
| Agoraphobia 0.1                                                                               | (0.0;1.2)                | 1,107                | 0.1 (0.0; 1.7)            | 1,492                | 0.1 (0.0;0.8)                         | 4,699                |
| Panic disorder                                                                                | 0.3 (0.1;0.9)            | 6,999                | 0.6 (0.1;1.1)             | 14,907               | 0.5 (0.1; 1.0)                        | 21,911               |
| Social phobia                                                                                 | 0.4 (0.1;1.1)            | 9,141                | 0.7 (0.2;1.3)             | 16,666               | 0.6 (0.1; 1.1)                        | 25,812               |
| <b>Any Mood disorder</b>                                                                      | <b>1.1 (0.5;1.9)</b>     | <b>24,335</b>        | <b>1.3 (0.8;1.7)</b>      | <b>32,328</b>        | <b>1.2 (0.6; 1.9)</b>                 | <b>56,388</b>        |
| Major Depression                                                                              | 1.0 (0.4;2.0)            | 20,956               | 1.3 (0.8; 1.6)            | 31,141               | 1.1 (0.5; 1.8)                        | 52,104               |
| Mania 0.3                                                                                     | (0.1;1.1)                | 5,613                | 0.2 (0.0; 1.1)            | 5,661                | 0.2 (0.0; 1.0)                        | 11,273               |
| <b>Any Substance use disorder*</b>                                                            | <b>0.8 (0.2;1.4)</b>     | <b>17,698</b>        | <b>1.2 (0.7; 1.8)</b>     | <b>29,841</b>        | <b>1.1 (0.8; 1.5)</b>                 | <b>51,689</b>        |
| Alcohol Dependence                                                                            | 0.7 (0.1;1.5)            | 14,402               | 0.9 (0.4; 1.3)            | 22,106               | 0.8 (0.5; 1.2)                        | 36,514               |
| Substance Abuse                                                                               | 0.2 (0.0;1.2)            | 4,565                | 0.4 (0.1; 1.0)            | 8,625                | 0.3 (0.0; 0.9)                        | 13,193               |
| Illicit Drug Dependence                                                                       | 0.1 (0.0;1.8)            | 1,106                | 0.1 (0.0; 1.6)            | 1,989                | 0.1 (0.0; 1.5)                        | 2,819                |
| <b>TOTAL (Any Disorder)</b>                                                                   | <b>1.5 (0.8;2.3)</b>     | <b>33,184</b>        | <b>2.1 (1.0;2.9)</b>      | <b>52,222</b>        | <b>2.0 (1.3; 2.6)</b>                 | <b>93,980</b>        |

Note: Since multiple disorders are possible in the same individual, the same child may be exposed to more than one.

<sup>a</sup> total number of children estimated based on 2006 Census of Canada estimates.

\*Problems or dependence
